1                                    **Efficiency of genomic prediction of non-assessed single crosses**

2            José Marcelo Soriano Viana,<sup>\*1</sup> Helcio Duarte Pereira,<sup>1</sup> Gabriel Borges Mundim,<sup>†</sup> Hans-Peter  
3                                    Piepho,<sup>‡</sup> and Fabyano Fonseca e Silva<sup>§</sup>

4            <sup>\*</sup>Federal University of Viçosa, Department of General Biology, 36570-900, Viçosa, MG, Brazil.

5            <sup>†</sup>Down AgroSciences, Indianópolis, MG, Brazil.

6            <sup>‡</sup>University of Hohenheim, Institute of Crop Science, Biostatistics Unit, 70599, Stuttgart, Germany.

7            <sup>§</sup>Federal University of Viçosa, Department of Animal Science, 36570-900, Viçosa, MG, Brazil.

8            Reference        number        for        data        available        in        public        repository:

9            <https://doi.org/10.6084/m9.figshare.5035130.v1>

10          *REALbreeding* private link: <https://figshare.com/s/618bee7accd410464232>.

11 Running title: Genomic prediction of single crosses.

12 **KEYWORDS** genomic selection; linkage disequilibrium; general combining ability; specific  
13 combining ability; doubled haploids.

14 <sup>1</sup>Corresponding author: José Marcelo Soriano Viana. Federal University of Viçosa, Department of  
15 General Biology, 36570-900, Viçosa, MG, Brazil. E-mail: [jmsviana@ufv.br](mailto:jmsviana@ufv.br). Telephone:  
16 +55(31)3899-2514.

17 **ABSTRACT** The objective was to provide a definitive proof that prediction of non-assessed single  
18 crosses (SCs) is efficient. We provided a new genetic model for genomic prediction. The SNP and  
19 QTL genotypic data for DH lines, the QTL genotypic data of SCs, and the phenotypic data for DH  
20 lines and SCs were simulated assuming 10,000 SNPs, 400 QTLs, two groups of 70 selected DH  
21 lines, and 4,900 SCs. The heritabilities for the assessed SCs were 30, 60 and 100%. The scenarios  
22 included three sampling processes of DH lines, two sampling processes of SCs for testing, two SNP  
23 densities, DH lines from the same population, DH lines from populations with lower LD, two  
24 genetic models, three statistical models, and three statistical approaches. The efficiency of  
25 prediction of untested SCs was based on the prediction accuracy and the efficacy of identification of  
26 the best 300 (7-9%) non-assessed SCs (coincidence index), computed based on the true genotypic  
27 values. Concerning the prediction accuracy and coincidence, our results proved that prediction of  
28 untested SCs is very efficient. The accuracies and coincidences ranged from approximately 0.80  
29 and 0.50, respectively, under low heritability, to 0.90 and 0.7, assuming high heritability.  
30 Additionally, we highlighted the relevance of the overall LD and evidenced that efficient prediction  
31 of untested SCs can be achieved for crops that show no heterotic pattern, for reduced training size  
32 set (10%), for SNP density of 1 cM, and for distinct sampling processes of DH lines, based on  
33 random choice of the SCs for testing.

## 34 INTRODUCTION

35 The genomic selection is a reality in animal breeding, especially for dairy cattle (Van  
36 Eenennaam et al. 2014). The same cannot yet be said concerning crop breeding, with exceptions.

37 The main reasons for the effective application of genomic selection in livestock breeding are: it is  
38 efficient, that is, the process has high prediction accuracy, the cost of phenotyping (mainly progeny  
39 test) is higher than the cost of genotyping, and the process significantly shorten the selection cycle  
40 (Meuwissen et al. 2013). It is worth to remember that prediction of breeding and genotypic values is  
41 not exclusive for genomic selection, having been pioneered by the best linear unbiased prediction  
42 method (BLUP) (Henderson 1974). In spite of the many field and simulation-based studies with  
43 genomic selection in plant breeding, in general the cost of phenotyping is much lower than the cost  
44 of genotyping, restricting its application in breeding programs. Jonas and de Koning (2013)  
45 consider that genomic selection has the potential to improve existing plant breeding schemes.  
46 However, based also on the high diversity and complexity of plant breeding methods, they stated  
47 that there are great obstacles to overcome.

48 An important application of genomic selection in plant breeding is the prediction of untested  
49 single crosses (genotypic value prediction) and testcrosses (general combining ability effect  
50 prediction) in hybrid breeding (Zhao et al. 2015). The prediction of untested single crosses was  
51 pioneered by Bernardo (1994), also based on BLUP. Many significant studies on prediction of  
52 untested single cross and testcross performance have been published in the last 23 years, focused on  
53 the assessment of the prediction accuracy. Most investigations were based on empirical data and  
54 estimated the prediction accuracy using a cross-validation procedure. Very few were based on  
55 simulated data (Li et al. 2017; Technow et al. 2012a). With no exception, the inference was that  
56 prediction of untested single crosses and testcrosses is an efficient process, proportional to  
57 heritability, training set size, and number of tested inbreds in hybrid combination (both, one, and  
58 none parents tested). It is impressive that this inference have been stated from studies differing for  
59 molecular markers, density of markers, number of inbreds, level of relatedness, diversity and  
60 linkage disequilibrium (LD) between inbreds, heterotic patterns, training set size, genetic model,  
61 and statistical approach (Zhao et al. 2015).

62 Most papers on genomic prediction of maize single cross performance published since 2011  
63 have employed single nucleotide polymorphism (SNP), with the SNP number in the range 425  
64 (Zhao et al. 2013a) to 39,627 (Technow et al. 2012a). Based on the physical length of the maize  
65 genome (approximately 2,000 megabase pairs (Mb) according to Maize genetics and genomics  
66 database), the density ranged from approximately 5 to 0.05 Mb, respectively. For grain yield, the  
67 relative prediction accuracies (accuracy/root square of the heritability) in these two papers ranged  
68 from 0.27 to 0.62 and from 0.65 to 0.95, respectively. The number of inbreds in each heterotic  
69 group was highly variable too, ranging from six and nine (Bernardo 1994) to 75 and 75 (Technow et  
70 al. 2012a). The relative accuracy observed by Bernardo (1994) ranged between 0.72 and 0.89. The  
71 number of testcrosses ranged between 255 (Windhausen et al. 2012) and 1,894 (Albrecht et al.  
72 2014). The relative accuracies ranged from 0.46 to 0.52 and from 0.33 to 0.65, respectively. The  
73 level of relatedness ranged from non-related inbreds in each group (Technow et al. 2012a) to an  
74 maximum average value of 0.58 (Bernardo 1995). The relative accuracy obtained by Bernardo  
75 (1995) ranged from 0.41 to 0.80. The common heterotic groups were Stiff Stalk and non-Stiff Stalk  
76 (Kadam et al. 1916) or Dent and Flint (Technow et al. 2014). The study of Bernardo (1996a)  
77 involved nine heterotic groups and the (statistically significant) relative accuracies ranged from 0.43  
78 to 0.88. No study provided clearly greater prediction accuracy of the additive-dominance model  
79 relative to the additive model. Finally, only with testcrosses the genomic BLUP (GBLUP) approach  
80 outperformed BLUP (Albrecht et al. 2014; Albrecht et al. 2011) concerning prediction accuracy.

81 After so many years of research on prediction of untested single crosses, with consistent  
82 results from reduced and large data sets, it is was a challenge to plan a study that could provide a  
83 new and significant contribution on efficiency of prediction of untested single cross performance.  
84 We believe have achieved our purpose. For the first time, our simulation study has provided for  
85 breeders a direct measure of efficiency of identification of the best 300 of the really non-assessed  
86 single crosses, additionally to the standard prediction accuracy (coincidence index). These measures  
87 of efficacy were provided for a large data set (4,900 single crosses) and for low (30%) to high

88 heritability (100%), assuming scenarios not favorable to prediction of non-assessed single cross  
89 performance, as low level of relatedness and a not high heterotic pattern. Additionally, we provided  
90 a new genetic model for genomic prediction, supported by quantitative genetics theory, highlighted  
91 the relevance of the overall LD (not only for linked SNPs and QTLs), and evidenced that efficient  
92 prediction of untested single crosses can be achieved for crops that show no clear heterotic pattern,  
93 as rice, wheat, and barley, for reduced training size set (10%), for SNP density of 1 cM, and for  
94 distinct processes of doubled haploid (DH) lines sampling. Finally, we showed that the choice of  
95 the single crosses for testing must be based on a random process, but never by sampling DH or  
96 inbreds lines for a diallel. Thus, our objective was to provide to breeders a definitive proof that  
97 prediction of non-assessed single crosses can be efficient and that they should make widespread use  
98 of this procedure for identification of the best hybrids, prior to field testing.

## 99 MATERIALS AND METHODS

### 100 Theory

#### 101 *LD in a group of selected DH or inbred lines*

102 Consider a group of DH or inbred lines selected from a population or heterotic group. Assume  
103 also a quantitative trait locus (QTL) (alleles B/b) and a SNP (alleles C/c) where B and b are the  
104 alleles that increase and decrease the trait expression, respectively. Define the joint genotype  
105 probabilities (equal to the joint haplotype probabilities) as  $P(BBCC) = f_{22}$ ,  $P(BBcc) = f_{20}$ ,  
106  $P(bbCC) = f_{02}$ , and  $P(bbcc) = f_{00}$ , where the subscript indicates the number of copies of the  
107 major allele (B and C). The measure of LD between the QTL and the SNP is  
108  $\Delta_{bc} = f_{22}f_{00} - f_{20}f_{02}$  (Kempthorne 1954) and the haplotype frequencies are  
109  $P(BC) = f_{22} = p_b p_c + \Delta_{bc}$ ,  $P(Bc) = f_{20} = p_b q_c - \Delta_{bc}$ ,  $P(bC) = f_{02} = q_b p_c - \Delta_{bc}$ , and  
110  $P(bc) = f_{00} = q_b q_c + \Delta_{bc}$ , where  $p$  is the frequency of the major allele (B or C) and  $q = 1 - p$  is  
111 the frequency of the minor allele (b or c). Notice that  $p_b = f_{22} + f_{20}$  and  $p_c = f_{22} + f_{02}$ . It is

112 important to highlight the fact that we are not assuming that the QTL and the SNP are linked and in  
 113 LD in the population or heterotic group, because this is not necessary for genomic prediction. But  
 114 we are assuming that they are in LD in the group of DH or inbred lines. Furthermore, because  
 115 selection, genetic drift, and inbreeding (only for inbreds and linked QTLs and SNPs), the gene and  
 116 genotypic frequencies and the LD values concerning the selected DH or inbred lines cannot be  
 117 traced to the values in the population or heterotic group.

### 118 *SNP genotypic values of DH or inbred lines*

119 The average genotypic value for a group of selected DH or inbred lines is

120  $M_{IL} = m_b + (p_b - q_b)a_b$ , where  $m_b$  is the mean of the genotypic values of the homozygotes and

121  $a_b$  is the deviation between the genotypic value of the homozygote of higher expression and  $m_b$ .

122 Thus, the average SNP genotypic values for the DH or inbred lines CC and cc are

123 
$$G_{CC} = \frac{1}{f_{.2}} \left[ f_{22}(m_b + a_b) + f_{02}(m_b - a_b) \right] = M_{IL} + 2q_c \alpha_{SNP} = M_{IL} + A_{CC}$$

124 
$$G_{cc} = \frac{1}{f_{.0}} \left[ f_{20}(m_b + a_b) + f_{00}(m_b - a_b) \right] = M_{IL} - 2p_c \alpha_{SNP} = M_{IL} + A_{cc}$$

125 where  $\alpha_{SNP} = \left[ \frac{\Delta_{bc}}{p_c q_c} \right] a_b = \kappa_{bc} a_b$  is the average effect of a SNP substitution in the group of DH

126 or inbred lines and A is the SNP additive value for a DH or inbred line. Notice that  $E(A) = 0$ .

127 Assuming two QTLs (alleles B and b, and E and e) in LD with the SNP, the average effect of

128 a SNP substitution in the selected DH or inbred lines is  $\alpha_{SNP} = \kappa_{bc} a_b + \kappa_{ce} a_e$ , where

129  $\kappa_{ce} = \left[ \frac{\Delta_{ce}}{p_c q_c} \right]$ . Thus, in general, the average effect of a SNP substitution (and the SNP additive

130 value) is proportional to the measure of LD and to the a deviation for each QTL that is in LD with

131 the marker.

132 ***SNP genotypic values of single crosses***

133 Aiming to maximize the heterosis, maize breeders commonly assess single crosses originated  
 134 from selected DH or inbred lines from distinct heterotic groups. Consider  $n_1$  DH or inbred lines  
 135 from a population or heterotic group and  $n_2$  DH or inbred lines from a distinct population or  
 136 heterotic group. The average genotypic value for the single crosses derived by crossing the DH or  
 137 inbred lines from group 1 with the DH or inbred lines from group 2 is

$$138 \quad M_H = m_b + \left( p_{b1}p_{b2} - q_{b1}q_{b2} \right) a_b + \left( p_{b1}q_{b2} + q_{b1}p_{b2} \right) d_b$$

139 where  $d_b$  is the dominance deviation (the deviation between the genotypic value of the  
 140 heterozygote and  $m_b$ ).

141 The average genotypic values for the single crosses derived from DH or inbred lines CC and  
 142 cc of the group 1 are

$$143 \quad M_{CC1} = M_H + q_{c1} \kappa_{bc1} \left[ a_b + \left( q_{b2} - p_{b2} \right) d_b \right] = M_H + q_{c1} \kappa_{bc1} \alpha_{b2} = M_H + q_{c1} \alpha_{SNP1}$$

$$= M_H + GCA_{CC1}$$

$$144 \quad M_{cc1} = M_H - p_{c1} \kappa_{bc1} \alpha_{b2} = M_H - p_{c1} \alpha_{SNP1} = M_H + GCA_{cc1}$$

145 where  $\alpha_{b2}$  is the average effect of allelic substitution in the population derived by random crosses  
 146 between the DH or inbred lines of group 2,  $\alpha_{SNP1}$  is the SNP effect of allelic substitution in the  
 147 hybrid population relative to a SNP derived from group 1, and GCA stands for the general  
 148 combining ability effect for a SNP locus. Notice that  $\alpha_{SNP1}$  depends on the LD in group 1  
 149 ( $\kappa_{bc1} = \Delta_{bc1} / p_{c1}q_{c1}$ ) and the average effect of allelic substitution in the population derived by  
 150 random crosses between the DH or inbred lines of group 2. Further,  
 151  $E(GCA) = p_{c1}GCA_{CC1} + q_{c1}GCA_{cc1} = 0$ . Concerning the single crosses derived from DH or  
 152 inbred lines CC and cc of the group 2 we have

$$153 \quad M_{CC2} = M_H + q_{c2}\kappa_{bc2} \left[ a_b + (q_{b1} - p_{b1})d_b \right] = M_H + q_{c2}\kappa_{bc2}\alpha_{b1} = M_H + q_{c2}\alpha_{SNP2}$$

$$= M_H + GCA_{CC2}$$

$$154 \quad M_{cc2} = M_H - p_{c2}\kappa_{bc2}\alpha_{b1} = M_H - p_{c2}\alpha_{SNP2} = M_H + GCA_{cc2}$$

155 Notice that  $E(GCA) = 0$  also. The average genotypic values for the single crosses concerning  
156 the SNP locus are

$$157 \quad M_{CC1 \times CC2} = M_H + q_{c1}\alpha_{SNP1} + q_{c2}\alpha_{SNP2} - 2q_{c1}q_{c2}\kappa_{bc1}\kappa_{bc2}d_b$$

$$= M_H + GCA_{CC1} + GCA_{CC2} + SCA_{CC1 \times CC2}$$

$$158 \quad M_{cc1 \times cc2} = M_H - p_{c1}\alpha_{SNP1} - p_{c2}\alpha_{SNP2} - 2p_{c1}p_{c2}\kappa_{bc1}\kappa_{bc2}d_b$$

$$= M_H + GCA_{cc1} + GCA_{cc2} + SCA_{cc1 \times cc2}$$

$$159 \quad M_{CC1 \times cc2} = M_H + q_{c1}\alpha_{SNP1} - p_{c2}\alpha_{SNP2} + 2q_{c1}p_{c2}\kappa_{bc1}\kappa_{bc2}d_b$$

$$= M_H + GCA_{CC1} + GCA_{cc2} + SCA_{CC1 \times cc2}$$

$$160 \quad M_{cc1 \times CC2} = M_H - p_{c1}\alpha_{SNP1} + q_{c2}\alpha_{SNP2} + 2p_{c1}q_{c2}\kappa_{bc1}\kappa_{bc2}d_b$$

$$= M_H + GCA_{cc1} + GCA_{CC2} + SCA_{cc1 \times CC2}$$

161 where  $\kappa_{bc1}\kappa_{bc2}d_b = d_{SNP}$  is the SNP dominance deviation in the hybrid population and SCA  
162 stands for the specific combining ability effect for a SNP locus. Notice that  $E(SCA) =$   
163  $p_{c1}p_{c2}SCA_{CC1 \times CC2} + p_{c1}q_{c2}SCA_{CC1 \times cc2} + q_{c1}p_{c2}SCA_{cc1 \times CC2} + q_{c1}q_{c2}SCA_{cc1 \times cc2} = 0$  and  
164 , for each group,  $E(SCA|CC) = E(SCA|cc) = 0$ . That is, the expectation of the SNP SCA effects  
165 given a SNP genotype for the common DH or inbred line is also zero. Notice also that the four  
166 genotypic values depends on four parameters ( $M_H$ ,  $\alpha_{SNP1}$ ,  $\alpha_{SNP2}$ , and  $d_{SNP}$ ).

167 Assuming two QTLs (alleles B and b, and E and e) in LD with the SNP, the SNP dominance  
168 deviation is  $d_{SNP} = \kappa_{bc1}\kappa_{bc2}d_b + \kappa_{ce1}\kappa_{ce2}d_e$ . Thus, generally, the SNP dominance deviation



169 (and the SNP SCA effect) is proportional to the product of the LD values in both groups of DH or  
 170 inbred lines and to the dominance deviation for each QTL that is in LD with the marker.

171 The previous model expressed as a function of the GCA and SCA effects is that proposed by  
 172 Massman et al. (2013), but these authors assumed  $GCA_{CC} + GCA_{cc} = 0$  (for each heterotic group  
 173 and for each SNP) and  $SCA_{CC1 \times CC2} = SCA_{cc1 \times cc2} = -SCA_{CC1 \times cc2} = -SCA_{cc1 \times CC2}$ .  
 174 Technow et al. (2012b) have used a standard extension from QTL to SNP, defining the single cross  
 175 genotypic value for a SNP as a function of the SNP a and d deviations. That is,  
 176  $M = M_H + u_1 a_1 + u_2 a_2 + u_3 d$ , where  $u_1$  and  $u_2$  equal to 1/2 or -1/2 if the corresponding DH or  
 177 inbred line is homozygous for distinct SNP alleles (CC or cc), and  $u_3$  equal to 0 if the single cross  
 178 is homozygous or 1 if heterozygous.

179 ***SNP genotypic values of single crosses from DH or inbred lines derived from the same***  
 180 ***population or heterotic group***

181 Well defined heterotic groups are known for maize, but not for special maize as popcorn and  
 182 sweet corn and for other crops as wheat (Zhao et al. 2013b), rice (Xu et al. 2014), and barley  
 183 (Philipp et al. 2016). Thus, for many breeders, it is interesting to know about the efficiency of  
 184 genomic prediction of singles crosses when there are no heterotic groups. Assuming n DH or inbred  
 185 lines derived from the same population or heterotic group, the average genotypic values for the  
 186 single crosses concerning the SNP locus are

187  $M_{CC \times CC} = M + 2q_c \alpha_{SNP} - 2q_c^2 \kappa_{bc}^2 d_b = M + 2GCA_{CC} + SCA_{CC \times CC}$

188  $M_{cc \times cc} = M - 2p_c \alpha_{SNP} - 2p_c^2 \kappa_{bc}^2 d_b = M + 2GCA_{cc} + SCA_{cc \times cc}$

189  $M_{CC \times cc} = M + 2(q_c - p_c) \alpha_{SNP} + 2p_c q_c \kappa_{bc}^2 d_b = M + GCA_{CC} + GCA_{cc} + SCA_{CC \times cc}$

190 where  $M = m_b + (p_c - q_c) a_b + 2p_c q_c d_b$  is the hybrid population mean,

191  $\alpha_{SNP} = \kappa_{bc} [a_b + (q_b - p_b) d_b] = \kappa_{bc} \alpha_b$  is the average effect of a SNP substitution in the hybrid

192 population, and  $d_{\text{SNP}} = \kappa_{bc}^2 d_b$  is the SNP dominance deviation. Notice that the SNP GCA effects  
 193 are equal to half the SNP additive value for the single crosses (A), the SNP SCA effects are the SNP  
 194 dominance deviations for the single crosses (D), and that the three genotypic values depends on  
 195 three parameters ( $M$ ,  $\alpha_{\text{SNP}}$ , and  $d_{\text{SNP}}$ ). Notice also that  $E(\text{GCA}) = E(\text{A}) = E(\text{SCA}) =$   
 196  $E(\text{SCA}|\text{CC}) = E(\text{SCA}|\text{cc}) = E(\text{D}) = 0$ .

### 197 *Accuracy of single cross genomic prediction*

198 Assuming a QTL and a SNP in LD in the two groups of DH or inbred lines, the predictor of  
 199 the single cross QTL genotypic value is the single cross SNP genotypic value (because they are  
 200 proportional). Thus, the covariance between predictor and predicted genotypic value is

$$\begin{aligned}
 \text{Cov}(\tilde{G}, G) &= f_{22}^1 f_{22}^2 \left[ M_H + \text{GCA}_{\text{CC1}} + \text{GCA}_{\text{CC2}} + \text{SCA}_{\text{CC1} \times \text{CC2}} \right] \left[ M_H + \text{GCA}_{\text{BB1}} + \text{GCA}_{\text{BB2}} + \text{SCA}_{\text{BB1} \times \text{BB2}} \right] + \\
 &\quad + f_{22}^1 f_{20}^2 \left[ M_H + \text{GCA}_{\text{CC1}} + \text{GCA}_{\text{cc2}} + \text{SCA}_{\text{CC1} \times \text{cc2}} \right] \left[ M_H + \text{GCA}_{\text{BB1}} + \text{GCA}_{\text{BB2}} + \text{SCA}_{\text{BB1} \times \text{BB2}} \right] + \\
 &\quad \dots \\
 201 \quad &\quad + f_{00}^1 f_{00}^2 \left[ M_H + \text{GCA}_{\text{cc1}} + \text{GCA}_{\text{cc2}} + \text{SCA}_{\text{cc1} \times \text{cc2}} \right] \left[ M_H + \text{GCA}_{\text{bb1}} + \text{GCA}_{\text{bb2}} + \text{SCA}_{\text{bb1} \times \text{bb2}} \right] - (M_H)^2 \\
 &= p_{c1} q_{c1} \left( \kappa_{bc1} \alpha_{b2} \right)^2 + p_{c2} q_{c2} \left( \kappa_{bc2} \alpha_{b1} \right)^2 + 4 p_{c1} q_{c1} p_{c2} q_{c2} \left( \kappa_{bc1} \kappa_{bc2} d_b \right)^2 \\
 &= p_{c1} q_{c1} \left( \alpha_{\text{SNP1}} \right)^2 + p_{c2} q_{c2} \left( \alpha_{\text{SNP2}} \right)^2 + 4 p_{c1} q_{c1} p_{c2} q_{c2} \left( d_{\text{SNP}} \right)^2 \\
 &= \sigma_{\text{GCA}_{\text{SNP}}}^{2(1)} + \sigma_{\text{GCA}_{\text{SNP}}}^{2(2)} + \sigma_{\text{SCA}_{\text{SNP}}}^2 = \sigma_{\text{G}(\text{SNP})}^2
 \end{aligned}$$

202  
 203 where the GCA and SCA effects for the QTL are  $\text{GCA}_{\text{BB1}} = q_{b1} \alpha_{b2}$ ,  $\text{GCA}_{\text{bb1}} = -p_{b1} \alpha_{b2}$ ,

204  $\text{GCA}_{\text{BB2}} = q_{b2} \alpha_{b1}$ ,  $\text{GCA}_{\text{bb2}} = -p_{b2} \alpha_{b1}$ ,  $\text{SCA}_{\text{BB1} \times \text{BB2}} = -2 q_{b1} q_{b2} d_b$ ,

205  $\text{SCA}_{\text{BB1} \times \text{bb2}} = 2 q_{b1} p_{b2} d_b$ ,  $\text{SCA}_{\text{bb1} \times \text{BB2}} = 2 p_{b1} q_{b2} d_b$ , and  $\text{SCA}_{\text{bb1} \times \text{bb2}} = -2 p_{b1} p_{b2} d_b$ ,

206  $\sigma_{\text{GCA}}^2$  and  $\sigma_{\text{SCA}}^2$  are the GCA and SCA variances for the SNP locus, and  $\sigma_{\text{G}}^2$  is the SNP

207 genotypic variance. The GCA and SCA variances for the QTL are  $\sigma_{\text{GCA}}^{2(1)} = p_{b1} q_{b1} \left( \alpha_{b2} \right)^2$ ,

208  $\sigma_{GCA}^{2(2)} = p_{b2}q_{b2}(\alpha_{b1})^2$ , and  $\sigma_{SCA}^2 = 4p_{b1}q_{b1}p_{b2}q_{b2}(d_b)^2$ . The QTL genotypic variance is

209  $\sigma_G^2 = \sigma_{GCA}^{2(1)} + \sigma_{GCA}^{2(2)} + \sigma_{SCA}^2$  Thus, the single cross prediction accuracy is

210 
$$\rho_{\tilde{G}, G} = \sqrt{\frac{\sigma_{G(SNP)}^2}{\sigma_G^2}}$$

211 Assuming  $s$  SNPs,

212 
$$\rho_{\tilde{G}, G} = \frac{\sum_{r=1}^s \sigma_{G(SNP(r))}^2}{\sqrt{\sigma_{\tilde{G}}^2 \sigma_G^2}}$$

213 where  $\sigma_{\tilde{G}}^2$  is the variance of the predicted single cross genotypic values and  $\sigma_G^2$  is the single cross

214 genotypic variance. Further,

215 
$$\alpha_{SNP(r)1} = \sum_{i=1}^{k'} \left[ \frac{\Delta_{ri1}}{p_{r1}q_{r1}} \right] \alpha_{i2} = \sum_{i=1}^{k'} \kappa_{ri1} \alpha_{i2}$$
, where  $k'$  is the number of QTLs in LD with the SNP

216  $r$ ) in group 1, and

217 
$$d_{SNP(r)} = \sum_{i=1}^{k''} \left[ \frac{\Delta_{ri1}}{p_{r1}q_{r1}} \right] \left[ \frac{\Delta_{ri2}}{p_{r2}q_{r2}} \right] d_i = \sum_{i=1}^{k''} \kappa_{ri1} \kappa_{ri2} d_i$$
 where  $k''$  is the number of QTLs in LD with

218 the SNP  $r$  in both groups

219 Notice that because the accuracy of genomic prediction of single crosses depends on the  
 220 squares of the average effects of SNP substitution and the SNP dominance deviations, it is not  
 221 affected by the linkage phase (coupling or repulsion), as it does not depend on linkage. But it  
 222 depends on the magnitude of the LD in each group of DH or inbred lines.

223 Assuming single crosses derived from DH or inbred lines of a single population or heterotic

224 group we have  $\sigma_{G(SNP)}^2 = 2p_c q_c (\alpha_{SNP})^2 + (2p_c q_c d_{SNP})^2$  and

225  $\sigma_G^2 = 2p_b q_b (\alpha_b)^2 + (2p_b q_b d_b)^2$ . Therefore, the prediction accuracy of single crosses derived

226 from DH or inbred lines from two distinct populations or heterotic groups differ from the prediction  
227 accuracy of single crosses resulting from DH or inbred lines obtained from each population or  
228 heterotic group.

### 229 **The statistical model for single cross genomic prediction**

230 Assume  $n_1$  and  $n_2$  (several tens) DH or inbred lines from two populations or heterotic groups  
231 genotyped for  $s$  (thousands) SNPs and the experimental assessment of  $h$  (few hundred) single-  
232 crosses ( $h$  much lower than  $n_1 \cdot n_2$ ) in  $e$  (several) environments (a combination of growing seasons,  
233 years, and locals). Defining  $y$  as the adjusted single cross phenotypic mean, the statistical model  
234 for prediction of the average effects of SNP substitution and the SNP dominance deviations is

$$235 \quad y = M_H + \sum_{r=1}^s \left( z_{1_r} \alpha_{\text{SNP}1_r} + z_{2_r} \alpha_{\text{SNP}2_r} + z_{3_r} d_{\text{SNP}r} \right) + \text{error}$$

236 where  $z_{1_r} = q_{r1}$ ,  $z_{2_r} = q_{r2}$ , and  $z_{3_r} = -2q_{r1}q_{r2}$  if the SNP genotypes for the DH or inbred lines  
237 are CC (group 1) and CC (group 2),  $z_{1_r} = -p_{r1}$ ,  $z_{2_r} = -p_{r2}$ , and  $z_{3_r} = -2p_{r1}p_{r2}$  if the SNP  
238 genotypes for the DH or inbred lines are cc (group 1) and cc (group 2),  $z_{1_r} = q_{r1}$ ,  $z_{2_r} = -p_{r2}$ , and  
239  $z_{3_r} = 2q_{r1}p_{r2}$  if the SNP genotypes for the DH or inbred lines are CC (group 1) and cc (group 2),  
240 and  $z_{1_r} = -p_{r1}$ ,  $z_{2_r} = q_{r2}$ , and  $z_{3_r} = p_{r1}q_{r2}$  if the SNP genotypes for the DH or inbred lines are  
241 cc (group 1) and CC (group 2).

242 Regarding the single crosses obtained from DH or inbred lines of the same population or  
243 heterotic group we have

$$244 \quad y = M + \sum_{r=1}^s \left( z_{1_r} \alpha_{\text{SNP}r} + z_{2_r} d_{\text{SNP}r} \right) + \text{error}$$

245 where  $z_{1_r} = 2q_r$  and  $z_{2_r} = -2q_r^2$  if the SNP genotypes for the DH or inbred lines are CC and CC,

246  $z_{1_r} = -2p_r$  and  $z_{2_r} = -2p_r^2$  if the SNP genotypes for the DH or inbred lines are cc and cc, and

247  $z_{1_r} = 2(q_r - p_r)$  and  $z_{2_r} = 2p_rq_r$  if the SNP genotypes for the DH or inbred lines are CC and cc.

248 The statistical problem of genomic prediction when there are a very large number of  
249 molecular markers and relatively few observations have been addressed thorough several  
250 regularized whole-genome regression and prediction methods (Daetwyler et al. 2013; de Los  
251 Campos et al. 2013). Then, the predicted effects of SNP substitution and SNP dominance deviations  
252 must be used to provide genomic prediction of non-assessed single crosses. The predicted genotypic  
253 value for a non-assessed single cross of DH or inbred lines from two groups is

$$254 \quad \tilde{G} = \hat{M}_H + \sum_{r=1}^s \left( z_{1_r} \tilde{\alpha}_{\text{SNP}1_r} + z_{2_r} \tilde{\alpha}_{\text{SNP}2_r} + z_{3_r} \tilde{d}_{\text{SNP}r} \right)$$

255 For a non-assessed single cross of DH or inbred lines from the same group, the predicted  
256 genotypic value is

$$257 \quad \tilde{G} = \hat{M} + \sum_{r=1}^s \left( z_{1_r} \tilde{\alpha}_{\text{SNP}r} + z_{2_r} \tilde{d}_{\text{SNP}r} \right)$$

## 258 **Simulation**

259 The SNP and QTL genotypic data for DH lines, the QTL genotypic data of single crosses, and  
260 the phenotypic data for DH lines and single crosses were simulated using the software  
261 *REALbreeding*. The program has been developed by the first author using the software *REALbasic*  
262 *2009* (Viana et al. 2017a; Viana et al. 2017b; Viana et al. 2016; Azevedo et al. 2015; Viana et al.  
263 2013). Based on our input, the software distributed 10,000 SNPs and 400 QTLs in ten  
264 chromosomes (1,000 SNPs and 40 QTLs by chromosome). The average SNP density was 0.1  
265 centiMorgan (cM). The QTLs were distributed in the regions covered by the SNPs (approximately  
266 100 cM/chromosome). Initially, *REALbreeding* sampled 700 DH lines from two non-inbred  
267 populations (heterotic groups) in LD (350 from each population). The populations were composites

268 of two populations in linkage equilibrium. In a composite, there is LD only for linked SNPs and  
269 QTLs (Viana et al. 2016). The number of DH lines from each  $S_0$  plant was one (scenario 1) or  
270 ranged from 1 to 5 (scenario 2). We also sampled 350 DH lines from each population after three  
271 generations of selfing (using the single seed descent process). The number of DH lines from each  $S_3$   
272 plant ranged from 1 to 5 (scenario 3). For each scenario, the software then crossed 70 selected DH  
273 lines from each population, using a diallel design. The heritability for the DH lines was 30%.

274 The genotypic values of the DH lines and of the single crosses were generated assuming a  
275 single set of 400 QTLs and two degrees of dominance. To simulate grain yield and expansion  
276 volume, a measure of popcorn quality, we defined positive dominance ( $0 < (d/a)_i \leq 1.2$ ,  $i = 1, \dots,$   
277 400) and bidirectional dominance ( $-1.2 \leq (d/a)_i \leq 1.2$ ), respectively, where  $d/a$  is the degree of  
278 dominance. To compute the genotypic values, *REALbreeding* used our input relative to the  
279 maximum and minimum genotypic values for homozygotes. For grain yield and expansion volume,  
280 we defined 140 and 30 g/plant and 55 and 15 mL/g, respectively. The phenotypic values were  
281 obtained from the sum of the population mean, genotypic value, and experimental error. The error  
282 variance was computed from the broad sense heritability. To avoid outliers, we defined the  
283 maximum and minimum phenotypic values as 160 and 10 g/plant and 65 and 5 mL/g.

284 The heritabilities for the assessed single crosses were 30, 60, and 100%. Thus, the genotypic  
285 value prediction accuracies of the assessed single crosses were 0.55, 0.77, and 1.00, respectively.  
286 For each scenario were processed 50 resamplings of 30 and 10% of the single crosses (1,470 and  
287 490 assessed single crosses). That is, we predicted 70 and 90% of the single crosses (3,430 and  
288 4,410 non-assessed single crosses). Additionally, to assess the relevance of the number of DH lines  
289 sampled, we fixed the number of DH lines to achieve the same number of assessed single crosses,  
290 using a diallel. That is, we sampled 50 times 38 and 22 DH lines in each group for a diallel  
291 (scenario 4), generating 1,444 and 484 single crosses for assessment, respectively. We called these  
292 processes as sampling of single crosses (scenarios 1 to 3) and sampling of DH lines (scenario 4).  
293 Other additional scenarios were: genomic prediction of single crosses from selected DH lines from

294 same heterotic group (interestingly for wheat, rice, and barley breeders, for example) (scenario 5)  
295 and from selected DH lines from populations with lower LD (scenario 6), to emphasize that the  
296 prediction accuracy depends on the LD in the groups of DH or inbred lines. A last scenario  
297 (seventh) was genomic prediction of single crosses under an average density of one SNP each cM.  
298 This lower density was obtained by random sampling of 100 SNPs per chromosome using a  
299 *REALbreeding* tool (*sampler*). To investigate the single cross prediction efficiency based on our  
300 model and on the models proposed by Massman et al. (2013) and Technow et al. (2012b), we used  
301 another *REALbreeding* tool (*Incidence matrix*) to generate the incidence matrices for the three  
302 models and for the two DH lines sampling processes. To assess the relevance of the SCA effects  
303 prediction on genomic prediction of single cross performance, we also fitted the additive model  
304 (including only the GCA effects). We also processed single cross prediction based on GBLUP and  
305 BLUP.

## 306 **Statistical analysis**

307 The methods used for prediction were ridge regression BLUP (RR-BLUP), GBLUP (with the  
308 observed additive and dominance relationship matrices) and BLUP (with the expected additive and  
309 dominance relationship matrices). For the analyses we used the *rrBLUP* package (Endelman 2011).  
310 The accuracies of single cross genotypic value prediction were obtained by the correlation between  
311 the true values of the non-assessed single crosses computed by *REALbreeding* and the values  
312 predicted by RR-BLUP, GBLUP, and BLUP. We also computed the efficiency of identification of  
313 the 300 non-assessed single crosses of higher genotypic value (coincidence index). The parametric  
314 average coincidence index was computed by ordering the average phenotypic values of the 4,900  
315 single crosses for each heritability and for each DH lines derivation process. Regarding grain yield,  
316 for heritability of 30% the coincidence index was 0.2533, 0.2833, and 0.2433 assuming one DH line  
317 per  $S_0$  plant, one to five DH lines per  $S_0$  plant, and one to five DH lines per  $S_3$  plant, respectively.  
318 The corresponding values for heritability of 60% were, respectively, 0.4800, 0.4900, and 0.4567.  
319 Concerning expansion volume, the corresponding values for heritabilities of 30 and 60% were,

320 respectively, 0.2600, 0.2833, and 0.2700, and 0.4733, 0.5100, and 0.4533. The assumed average  
321 parametric coefficient index was 0.26 and 0.48 for heritabilities of 30 and 60%, respectively, for  
322 both traits. For the population structure analysis we employed *Structure* (Falush et al. 2003) and  
323 fitted the no admixture model with independent allelic frequencies. The number of SNPs, sample  
324 size, burn-in period, and number of MCMC (Markov chain Monte Carlo) replications were 1,000  
325 (sampled at random), 140 (70 DH lines from each population), 10,000, and 40,000, respectively.  
326 The number of populations assumed ( $K$ ) ranged from 1 to 4, and the most probable  $K$  value was  
327 determined based on the inferred plateau method (Viana et al. 2013). The LD analyses were  
328 performed with *Haploview* (Barrett et al. 2005).

### 329 **Data availability**

330 *REALbreeding* is available upon request. The data set is available at  
331 <https://doi.org/10.6084/m9.figshare.5035130.v1>. Data citation:

332 Viana, José Marcelo Soriano; Pereira, Hécio Duarte; Mundim, Gabriel Borges; Piepho, Hans-Peter;  
333 Fonseca e Silva, Fabyano (2017): Efficiency of genomic prediction of non-assessed single crosses.  
334 figshare. <https://doi.org/10.6084/m9.figshare.5035130.v1>

## 335 **RESULTS**

336 The parametric mean and genotypic variance in the populations 1 and 2 were 108.5 and 87.3  
337 (g/plant) and 4.7680 and 6.2580 (g/plant)<sup>2</sup>. The DH lines derivation processes (one and one to five  
338 per  $S_0$  plant and one to five per  $S_3$  plant) provided, for each population, selected DH lines with  
339 similar mean (approximately 97 and 76 g/plant for populations 1 and 2), inbreeding depression  
340 (approximately -10 and -13% for populations 1 and 2), and genotypic variance (approximately 6  
341 and 7 (g/plant)<sup>2</sup> for populations 1 and 2) and groups of single crosses also similar for mean  
342 (approximately 103 g/plant), heterosis (approximately 19%), and genotypic variance  
343 (approximately 4 (g/plant)<sup>2</sup>). Because we derived one to few DH lines from unrelated  $S_0$  and  $S_3$   
344 plants, the average level of relatedness between the selected DH lines was very low (zero and zero,  
345 0.0041 and 0.0041, and 0.0054 and 0.0074 assuming one DH line per  $S_0$ , one to five DH lines per



346  $S_0$ , and one to five DH lines per  $S_3$ , for populations 1 and 2, respectively). Concerning SNP data,  
347 the frequency distribution of the minor allele frequency (MAF) and the absolute value of the  
348 difference between a SNP allele frequency were also similar for both groups of selected DH lines,  
349 regardless of the DH line derivation process (Figure 1a, b, c). The average MAF was 0.33,  
350 regardless of the population and DH line derivation process. However, the evidence obtained by the  
351 population structure analysis was that the DH lines belong to two distinct subpopulations (suggested  
352  $K$  equal to 2.4 by the inferred plateau method). The percentages of non-polymorphic SNPs were  
353 very low (0.1 to 0.4%). No differences between allelic frequencies were observed for only 1.7 to  
354 2.1% of the SNPs. For approximately 70% of the SNPs, the absolute difference between allelic  
355 frequencies ranged from 0.1 to 0.6. Regarding LD, for the groups of selected DH lines the evidence  
356 based on the analysis of chromosome 1 (no difference between chromosomes is expected) is that  
357 LD extents for up to 35 cM, regardless of the DH lines derivation process (Figure 1c, d). Ignoring  
358 the non-significant LD values (LOD score lower than 3), for 17 to 20% of the SNP pairs the  $r^2$   
359 values ranged from 0.2 to 0.5 (average of 0.16, regardless of the DH lines group and derivation  
360 process).

361 Assuming our model, average SNP density of 0.1 cM, training set size of 30%, positive  
362 dominance (grain yield), additive-dominance model, and sampling of single crosses, the prediction  
363 accuracies of the non-assessed single crosses were greater than the accuracies of the assessed single  
364 crosses for low (up to 46% higher) and intermediate (up to 16% higher) heritabilities (Table 1;  
365 Figure 2a). As the prediction accuracy of assessed single crosses approaches 1.0, the accuracy of the  
366 non-assessed single crosses approaches approximately 0.9 (up to 11% lower). Sampling one to five  
367 DH lines per  $S_3$  plant was only slightly superior to the other DH lines derivation processes,  
368 regardless of the prediction accuracy of the assessed single crosses (up to 5% higher). Fitting the  
369 additive model provided essentially the same prediction accuracies since the maximum decrease  
370 was approximately 1%. No significant differences between the prediction accuracies of non-  
371 assessed single crosses were also observed assuming bidirectional dominance (expansion volume).

372 The differences compared to positive dominance ranged from approximately  $-5$  to  $2\%$ . However, a  
373 striking difference was observed between the sampling processes of single crosses for testing.  
374 Random sampling of single crosses provided much greater prediction accuracies of non-assessed  
375 single crosses, compared to sampling DH lines for a diallel. The increases in the accuracies by  
376 sampling single crosses ranged from approximately  $38$  to  $77\%$ , proportional to the heritability.  
377 Decreasing the average SNP density to  $1$  cM led to a slightly decrease in the prediction accuracy of  
378 non-assessed single crosses approximately  $-4\%$ ). Decreasing the training set size to  $10\%$  decreased  
379 the prediction accuracy of non-assessed single crosses in approximately  $-5$  to  $-15\%$ , inversely  
380 proportional to the heritability. To evidence that the prediction accuracy of non-assessed single  
381 crosses depends on the level of (overall) LD in the groups of selected DH or inbred lines, we  
382 derived DH lines from the same base populations after  $10$  generations of random crosses (to  
383 decrease the LD). The accuracies were also high, ranging from  $0.83$  to  $0.95$ , proportional to the  
384 heritability. The prediction accuracies of non-assessed single crosses from DH lines of the same  
385 population were equivalent to the accuracies for single crosses derived from DH lines belonging to  
386 distinct heterotic groups, ranging from  $0.83$  to  $0.91$ , also proportional to the heritability. Comparing  
387 our statistical model with the models proposed by Massman et al. (2013) and Technow et al.  
388 (2012a), we observed no differences for the prediction accuracies of non-assessed single crosses  
389 (maximum difference of  $1\%$ ). Finally, no significant differences between the prediction accuracies  
390 for RR-BLUP, GBLUP, and BLUP occurred (maximum of  $2\%$ ), excepting for one to five DH lines  
391 per  $S_3$  plant, where BLUP was  $9$  to  $10\%$  inferior, regardless of the heritability.

392 Concerning the coincidence index, in general the inferences are the same established from the  
393 prediction accuracy analysis (Table 2; Figure 2b). There were no differences between the  
394 coincidence indexes regarding our model and the models proposed by Massman et al. (2013) and  
395 Technow et al. (2012a) (maximum difference of  $3\%$ ), and between the RR-BLUP, GBLUP, and  
396 BLUP approaches, except for one to five DH lines per  $S_3$  plant, where BLUP was  $-19$  to  $-27\%$   
397 inferior, proportional to the heritability. The coincidence indexes were also high for single crosses

398 derived from selected DH lines obtained from the base populations with lower LD (ranging from  
399 0.55 to 0.76, proportional to the heritability) and from selected DH lines of the same population  
400 (ranging from 0.61 to 0.76, also proportional to the heritability). Sampling single crosses for  
401 assessment also provided much greater coincidence index compared to sampling DH lines for a  
402 diallel (39 to 98% higher, proportional to the heritability). Decreasing the SNP density and the  
403 training set size decreased the coincidence index from 5 to 10% (proportional to the heritability)  
404 and from 17 to 26% (inversely proportional to the heritability), respectively. The maximum  
405 difference in the coincidence index by fitting the additive-dominant and the additive models was  
406 -3%. Only for one DH line per  $S_0$  plant the coincidence indexes assuming bidirectional dominance  
407 were slightly greater than the values assuming positive dominance (9 to 14% greater). This  
408 sampling process of DH lines provided the higher values of coincidence index, compared to the  
409 other sampling processes (7 to 26% higher, inversely proportional to the heritability). Finally, the  
410 coincidence index of the non-assessed single crosses are greater than the parametric values for all  
411 assessed single crosses assuming low (up to 117% higher) and intermediate (up to 39% higher)  
412 heritabilities (Table 1). However, as the parametric coincidence of assessed single crosses  
413 approaches 1.0, the coincidence values of the non-assessed single crosses approach approximately  
414 0.60 to 0.74 (up to 26 to 40% lower), depending on the DH line sampling process.

415

## DISCUSSION

416 It was twenty-three years ago today, Bernardo (1994) taught the breeders to use BLUP (more  
417 precisely, GBLUP) for predicting untested maize single cross performance. BLUP, as well known,  
418 is the Henderson's (1974) approach for genetic assessment. Based on the prediction accuracies  
419 obtained by Bernardo (1994, 1995, 1996a, 1996b, 1996c), for grain yield and other traits (distinct  
420 genetic controls), a breeder should realize that the performance of untested single crosses can be  
421 effectively predicted using relationship information from molecular or pedigree data, unbalanced  
422 and large data set, and diverse heterotic patterns. This general inference has been confirmed with  
423 maize (Zhao et al. 2015) and other important crops, as rice (Xu et al. 2014), wheat (Zhao et al.

424 2013b) and barley (Philipp et al. 2016), along the last 20 years. Why, then, we did not find  
425 published information that prediction of untested single crosses is of general use by breeders of  
426 worldwide seed companies? What the scientific investigation should additionally prove to make  
427 prediction of untested single crosses as successful as the Jenkins' (1934) method for predicting  
428 double crosses performance was? We believe that this paper offers the final proof.

429 Our assessment on efficiency of prediction of untested single cross performance keeps some  
430 similarities with few earlier studies but sharp differences for most previous investigations. This  
431 study is based on simulated data set, as the study of Technow et al. (2012a), assuming 400 QTLs  
432 distributed along ten chromosomes. Thus, the prediction accuracies and coincidence indexes (a  
433 measure of untested single crosses selection efficiency) are for really non-assessed single crosses  
434 since the values were computed based on the true genotypic values of the non-assessed single  
435 crosses and not on a cross-validation procedure involving assessed single crosses. This not means  
436 that we consider simulated data better than field data or have any criticism on the cross-validation  
437 procedure. We know that simulated data, because the presuppositions, cannot integrally describe the  
438 complexity of populations and genetic determination of traits (Daetwyler et al. 2013). To highlight  
439 the relevance of (overall) LD, our study is based on scenarios not favorable to prediction of untested  
440 single cross performance: very low level of relationship between the DH lines, low and intermediate  
441 heritabilities for the assessed single crosses, and not higher heterotic pattern. In the studies of  
442 Massman et al. (2013) and Bernardo (1994, 1995, 1996a) the relationship among inbreds from the  
443 same heterotic group ranged from 0.11 to 0.58. Riedelsheimer et al. (2012) observed high  
444 relationships only within the non-Stiff Stalk inbreds. Technow et al. (2012a) assumed non-related  
445 inbreds. For most of the investigations on prediction of untested single crosses and testcrosses, the  
446 grain yield heritability ranged from 0.72 to 0.88. The common heterotic patterns in these previous  
447 studies are Stiff Stalk and non-Stiff Stalk, and Dent and Flint. The MAF in the groups of Dent and  
448 Flint inbreds were approximately 0.10 and 0.20, respectively, and approximately 20% of the SNPs  
449 showed a difference of allelic frequency of at least 0.6.

450           Concerning the prediction accuracy and the efficiency of identification of the superior 300  
451 non-assessed single crosses, our results prove that prediction of untested single crosses is a very  
452 efficient procedure (note that we are not saying genomic prediction), specially for low and  
453 intermediate heritabilities of the assessed single crosses. The prediction accuracy of the non-  
454 assessed single crosses under low (0.55 to 0.71) and intermediate (0.74 to 0.87) accuracies of  
455 assessed single crosses achieved 0.85 and 0.89, respectively. It is important to highlight that these  
456 are not relative accuracies. Most important, the coincidence of the non-assessed single crosses  
457 under low (0.26 to 0.39) and intermediate (0.44 to 0.66) parametric coincidences of assessed single  
458 crosses achieved 0.59 and 0.64, respectively. For high heritability (80 to 95%; accuracies from 0.89  
459 to 0.97), as observed in most of the studies on prediction of untested single cross performance, we  
460 can state (based on values predicted by fitting a quadratic regression model) that the prediction  
461 accuracy of non-assessed single crosses is up to only 10% lower (0.87 to 0.92) and, most  
462 impressive, the coincidence index can range from 0.61 to 0.71 (parametric coincidences between  
463 0.72 to 0.93). Under maximum accuracy of assessed single crosses (1.0), the prediction accuracy  
464 and coincidence of non-assessed single crosses achieved 0.93 and 0.76. Thus, assuming high  
465 heritability, high density, and training set size of 30%, the accuracy can achieve 0.92 and the  
466 efficiency of identification of the best 9% of the non-assessed single crosses can achieve 0.71. It is  
467 important to highlight that this efficacy can be higher by using more related DH or inbred lines,  
468 under high LD. Thus, we strong recommend that maize breeders, as well as rice, wheat, and barley  
469 breeders, make widespread use of prediction of non-assessed single crosses, at least for preliminary  
470 screening or prior to field testing.

471           To take advantage of genomic prediction, Kadam et al. (2016) recommend redesigning hybrid  
472 breeding programs. However, because breeders are unlikely to rely solely on genomic predictions  
473 when selecting superior untested hybrids, Technow et al. (2014) believe that genomic prediction  
474 will be combined with field testing of the most promising experimental hybrids. For grain yield, the  
475 prediction accuracies observed by Bernardo (1994, 1995, 1996a) ranged from 0.14 to 0.80,

476 proportional to the heritability (in the range 35-74%) and training set size. The non-relative  
477 accuracies (relative accuracy x root square of heritability) observed in the studies of Kadam et al.  
478 (2016), Technow et al. (2014), Massman et al. (2013), Technow et al. (2012a), and Riedelsheimer et  
479 al. (2012) ranged between 0.20 and 0.86, also proportional to the heritability (in the range 53-98%)  
480 and training set size.

481 We hope that readers of this paper have realized the importance of (overall) LD for effective  
482 prediction of non-assessed single crosses, as well as genetic variability (see the parametric accuracy  
483 of genomic prediction). Although breeders do not have control on LD and relatedness between the  
484 DH or inbred lines, because selection they should always expect high level of overall LD in the  
485 groups of selected DH or inbred lines. Comparison of our LD assessment with the LD analyses  
486 from other studies is inadequate because we have distances in cM and not in base-pairs. But in  
487 general the level of LD was high ( $r^2$  of approximately 0.3) only for SNPs separated by up to 0.5 Mb  
488 (Technow et al. 2014; Massman et al. 2013; Technow et al. 2012a; Riedelsheimer et al. 2012). To  
489 maximize the prediction accuracy and the efficiency of identification of the best non-assessed single  
490 crosses it is necessary to adopt the random sampling of single crosses for testing instead of the  
491 random sampling of DH or inbred lines for a diallel. This is because sampling 30 or even 10% of  
492 the single crosses leads to single crosses for testing derived from all DH or inbred lines from each  
493 group. In our case, in every resampling assuming training set size of 30 and 10% we always get  
494 groups of assessed single crosses (1,470 and 490 single crosses, respectively) derived from the 70  
495 DH lines of each group. However, sampling DH lines for a diallel provided 1,440 and 484 single  
496 crosses for testing derived from 38 and 22 DH lines, respectively. Thus, the sampling of single  
497 crosses provides best prediction of the SNP average effects of substitution. Riedelsheimer et al.  
498 (2012) emphasized the need for large genetic variability to obtain high prediction accuracies.  
499 Further, their results indicated that pairs of closely related lines and population structuring only  
500 weakly contributed to the high prediction accuracies. Regarding dominance, because it can be a  
501 relevant genetic effect, breeders should always fit the additive-dominance model to maximize the

502 prediction accuracy and the efficiency of identification of the best non-assessed single crosses.  
503 Interestingly, in most of the studies on prediction of non-assessed single crosses the prediction  
504 accuracy did not significantly increase when modeling SCA in addition to GCA effects (Zhao et al.  
505 2015).

506 Concerning SNP density and training set size, factors related with the costs of genotyping and  
507 phenotyping, breeders should find a balance between efficiency and expenses, since maximizing  
508 SNP density and training set size maximizes the efficiency of untested single cross prediction.  
509 Based on our results, because the decreases in the prediction accuracy (approximately 4%) and  
510 coincidence index (5 to 10%) by decreasing the average SNP density from 0.1 to 1 cM are of  
511 reduced magnitude, we consider sufficient to employ custom genotyping to provide an average SNP  
512 density of 1 cM. Decreasing the training set size from 30 to 10% of the single crosses does not  
513 significantly affect the prediction accuracy under intermediate to high heritability (decrease of up to  
514 9%), but the coincidence index can be reduced in up to 21%. However, considering that the  
515 coincidence index will be kept in the range 0.48 to 0.61, proportional to the heritability, and that the  
516 maximum values are in the range 0.48 to 0.61, we also consider sufficient to assess at least 10% of  
517 the possible single crosses. As highlighted by Zhao et al. (2015), marker density only marginally  
518 affects the prediction accuracy of untested single crosses. For biparental populations, a plateau for  
519 the accuracy is reached with a few hundred markers. Technow et al. (2014) did not improved  
520 prediction accuracies by using higher SNP density. Additionally, the increase in the training set size  
521 led to a relative small increase in the prediction accuracy. However, the prediction accuracies  
522 obtained by Riedelsheimer et al. (2012) under high density (38,019 SNPs) were substantially  
523 greater than those reached with a low-density marker panel (1,152 SNPs). In the study of Technow  
524 et al. (2012a), the prediction accuracies increased with SNP density and number of parents tested in  
525 hybrid combination.

526 The DH lines sampling process, the heterotic pattern, and the statistical approach should not  
527 be worries for breeders. However, under high heritability notice that sampling more than one DH

528 line per  $S_0$  or  $S_3$  plant provided the higher coincidence values and high prediction accuracy in our  
529 study. For rice, wheat, and barley breeders our message is: high prediction accuracy and high  
530 efficiency of identification of superior non-assessed single crosses does not depend on heterotic  
531 groups but on the (overall) LD in the group or in each group of DH or inbred lines. In other words,  
532 the efficiency of prediction of non-assessed single crosses derived from DH or inbred lines from the  
533 same population can be as high as the efficiency of prediction of untested single crosses derived  
534 from DH or inbred lines from distinct heterotic groups. This is not confirmed comparing the relative  
535 prediction accuracies for grain yield of maize untested single crosses (from approximately 0.50 to  
536 0.95, for most studies) with those obtained with rice, wheat, and barley untested hybrids (0.50 to  
537 0.60, approximately) (Philipp et al. 2016; Xu et al. 2014; Zhao et al. 2013b). However, the lower  
538 relative prediction accuracies for untested rice, wheat, and barley hybrids should be due to lower  
539 LD level. Regarding the statistical approach, our model did not provide an increase in the efficiency  
540 of non-assessed single cross prediction, compared to the models proposed by Massman et al. (2013)  
541 and Technow et al. (2012a). It is important to highlight that our results showed that these two  
542 models are really identical (data not shown). Thus, because the simplified definition of the incidence  
543 matrices for these two previous models, it is quite safe to use any of them. Finally, the choice  
544 between the statistical approaches RR-BLUP (prediction of genotypic values of non-assessed single  
545 crosses based on prediction of SNP average effects of substitution), GBLUP (prediction of  
546 genotypic values of non-assessed single crosses based on additive and dominance genomic  
547 matrices), and BLUP (prediction of genotypic values of non-assessed single crosses based on  
548 additive and dominance matrices from pedigree records) is not a serious worry for breeders too. Our  
549 evidence is that there is no significant difference between RR-BLUP and GBLUP regarding  
550 prediction accuracy and efficiency of identification of the best untested single crosses. Further, even  
551 when the level of relatedness between the DH or inbred lines in each group is low, in general BLUP  
552 is as efficient as genomic prediction, excepting when the DH lines are derived from inbred  
553 population. Thus, DNA polymorphism is not essential for an efficient prediction of non-assessed



554 single cross performance. In his review on genomic selection in hybrid breeding, Zhao et al. (2015)  
555 state that the choice of the biometrical model has no substantial impact on the prediction accuracy  
556 of untested single crosses. Technow et al. (2014) observed that prediction methods GBLUP and  
557 BayesB resulted in very similar prediction accuracies. In the study of Massman et al. (2013), BLUP  
558 and RR-BLUP models did not lead to prediction accuracies that differed significantly. Comparing  
559 GBLUP and BayesB, Technow et al. (2012a) concluded that the latter method produced  
560 significantly higher accuracies for the additive-dominance models.

#### 561 ACKNOWLEDGMENTS

562 We thank the National Council for Scientific and Technological Development (CNPq), the  
563 Brazilian Federal Agency for Support and Evaluation of Graduate Education (Capes) and the  
564 Foundation for Research Support of Minas Gerais State (Fapemig) for financial support.

#### 565 LITERATURE CITED

- 566 Albrecht, T., H.-J. Auinger, V. Wimmer, J.O. Ogutu, C. Knaak *et al.*, 2014 Genome-based  
567 prediction of maize hybrid performance across genetic groups, testers, locations, and years.  
568 *Theoretical and Applied Genetics* 127 (6):1375-1386.
- 569 Albrecht, T., V. Wimmer, H.-J. Auinger, M. Erbe, C. Knaak *et al.*, 2011 Genome-based prediction  
570 of testcross values in maize. *Theoretical and Applied Genetics* 123 (2):339-350.
- 571 Bernardo, R., 1994 Prediction of maize single-cross performance using RFLPs and information  
572 form related hybrids. *Crop Science* 34: 20-25.
- 573 Bernardo, R., 1995 Genetic models for predicting maize single-cross performance in unbalanced  
574 yield trial data. *Crop Science* 35: 141-147.
- 575 Bernardo, R., 1996a Best linear unbiased prediction of maize single-cross performance. *Crop Sci*  
576 36: 50-56.
- 577 Bernardo, R., 1996b Best linear unbiased prediction of maize single-cross performance given  
578 erroneous inbred relationships. *Crop Science* 36: 862-866.

- 579 Bernardo, R., 1996c Best linear unbiased prediction of the performance of crosses between untested  
580 maize inbreds. *Crop Science* 36: 872-876.
- 581 Azevedo, C.F., M.D. Vilela de Resende, F. Fonseca e Silva, J.M. Soriano Viana, M.S. Ferreira  
582 Valente *et al.*, 2015 Ridge, Lasso and Bayesian additive-dominance genomic models. *BMC*  
583 *Genet* 16.
- 584 Barrett, J.C., B. Fry, J. Maller, and M.J. Daly, 2005 Haploview: analysis and visualization of LD  
585 and haplotype maps. *Bioinformatics* 21 (2):263-265.
- 586 Daetwyler, H.D., M.P.L. Calus, R. Pong-Wong, G. de los Campos, and J.M. Hickey, 2013 Genomic  
587 Prediction in Animals and Plants: Simulation of Data, Validation, Reporting, and  
588 Benchmarking. *Genetics* 193 (2):347-+.
- 589 de Los Campos, G., J.M. Hickey, R. Pong-Wong, H.D. Daetwyler, and M.P. Calus, 2013 Whole-  
590 genome regression and prediction methods applied to plant and animal breeding. *Genetics* 193  
591 (2):327-345.
- 592 Endelman, J.B., 2011 Ridge Regression and Other Kernels for Genomic Selection with R Package  
593 rrBLUP. *Plant Genome* 4 (3):250-255.
- 594 Falush, D., M. Stephens, and J.K. Pritchard, 2003 Inference of population structure using multilocus  
595 genotype data: linked loci and correlated allele frequencies. *Genetics* 164:1567–1587
- 596 Henderson, C.R., 1974 General flexibility of linear model techniques for sire evaluation. *Journal of*  
597 *Dairy Science* 57:963–972.
- 598 Jenkins, M.T, 1934 Methods of estimating the performance of double crosses in corn. *Journal of the*  
599 *American Society of Agronomy* 26:199–204.
- 600 Jonas, E., and D.J. de Koning, 2013 Does genomic selection have a future in plant breeding? *Trends*  
601 *in Biotechnology* 31 (9):497-504.
- 602 Kadam, D.C., S.M. Potts, M.O. Bohn, A.E. Lipka, and A.J. Lorenz, 2016 Genomic Prediction of  
603 Single Crosses in the Early Stages of a Maize Hybrid Breeding Pipeline. *G3-Genes Genomes*  
604 *Genetics* 6 (11):3443-3453.

- 605 Kempthorne, O., 1957 *An Introduction to Genetic Statistics*. John Wiley and Sons Inc., New York.
- 606 Li, Z., N. Philipp, M. Spiller, G. Stiewe, J.C. Reif *et al.*, 2017 Genome-Wide Prediction of the  
607 Performance of Three-Way Hybrids in Barley. *Plant Genome* 10 (1).
- 608 Massman, J.M., A. Gordillo, R.E. Lorenzana, and R. Bernardo, 2013 Genomewide predictions from  
609 maize single-cross data. *Theor Appl Genet* 126 (1):13-22.
- 610 Meuwissen, T., B. Hayes, and M. Goddard, 2013 Accelerating Improvement of Livestock with  
611 Genomic Selection. *Annual Review of Animal Biosciences, Vol 1* 1:221-237.
- 612 Philipp, N., G.Z. Liu, Y.S. Zhao, S. He, M. Spiller *et al.*, 2016 Genomic Prediction of Barley  
613 Hybrid Performance. *Plant Genome* 9 (2).
- 614 Riedelsheimer, C., A. Czedik-Eysenberg, C. Grieder, J. Lisec, F. Technow *et al.*, 2012 Genomic  
615 and metabolic prediction of complex heterotic traits in hybrid maize. *Nature Genetics* 44  
616 (2):217-220.
- 617 Technow, F., C. Riedelsheimer, T.A. Schrag, and A.E. Melchinger, 2012a Genomic prediction of  
618 hybrid performance in maize with models incorporating dominance and population specific  
619 marker effects. *Theoretical and Applied Genetics* 125 (6):1181-1194.
- 620 Technow, F., C. Riedelsheimer, T.A. Schrag, and A.E. Melchinger, 2012b Genomic prediction of  
621 hybrid performance in maize with models incorporating dominance and population specific  
622 marker effects. *Theor Appl Genet* 125 (6):1181-1194.
- 623 Technow, F., T.A. Schrag, W. Schipprack, E. Bauer, H. Simianer *et al.*, 2014 Genome Properties  
624 and Prospects of Genomic Prediction of Hybrid Performance in a Breeding Program of Maize.  
625 *Genetics* 197 (4):1343-U1469.
- 626 Van Eenennaam, A.L., K.A. Weigel, A.E. Young, M.A. Cleveland, and J.C.M. Dekkers, 2014  
627 Applied Animal Genomics: Results from the Field. *Annual Review of Animal Biosciences, Vol*  
628 *2* 2:105-139.

- 629 Viana, J.M.S., H.-P. Piepho, and F.F. Silva, 2016 Quantitative genetics theory for genomic  
630 selection and efficiency of breeding value prediction in open-pollinated populations. *Scientia*  
631 *Agricola* 73 (3):243-251.
- 632 Viana, J.M.S., H.P. Piepho, and F.F. Silva, 2017a Quantitative genetics theory for genomic  
633 selection and efficiency of genotypic value prediction in open-pollinated populations. *Scientia*  
634 *Agricola* 74 (1):41-50.
- 635 Viana, J.M.S., F.F. Silva, G.B. Mundim, C.F. Azevedo, and H.U. Jan, 2017b Efficiency of low  
636 heritability QTL mapping under high SNP density. *Euphytica* 213 (1).
- 637 Viana, J.M.S., M.S.F. Valente, F.F. Silva, G.B. Mundim, and G.P. Paes, 2013 Efficacy of  
638 population structure analysis with breeding populations and inbred lines. *Genetica* 141 (7-  
639 9):389-399.
- 640 Windhausen, V.S., G.N. Atlin, J.M. Hickey, J. Crossa, J.-L. Jannink *et al.*, 2012 Effectiveness of  
641 Genomic Prediction of Maize Hybrid Performance in Different Breeding Populations and  
642 Environments. *G3-Genes Genomes Genetics* 2 (11):1427-1436.
- 643 Xu, S., D. Zhu, and Q. Zhang, 2014 Predicting hybrid performance in rice using genomic best linear  
644 unbiased prediction. *Proceedings of the National Academy of Sciences of the United States of*  
645 *America* 111 (34):12456-12461.
- 646 Zhao, Y., M. Gowda, W. Liu, T. Wuerschum, H.P. Maurer *et al.*, 2013a Choice of shrinkage  
647 parameter and prediction of genomic breeding values in elite maize breeding populations. *Plant*  
648 *Breeding* 132 (1):99-106.
- 649 Zhao, Y., M.F. Mette, and J.C. Reif, 2015 Genomic selection in hybrid breeding. *Plant Breeding*  
650 134 (1):1-10.
- 651 Zhao, Y., J. Zeng, R. Fernando, and J.C. Reif, 2013b Genomic Prediction of Hybrid Wheat  
652 Performance. *Crop Science* 53 (3):802.

653 **Table 1** Average prediction accuracies of non-assessed single crosses and its standard deviation,  
 654 assuming single crosses from selected DH lines, 30 and 10% of assessed single crosses, two traits  
 655 (grain yield - GY, g/plant, and expansion volume - EV, mL/g), two sampling processes of single  
 656 crosses, four statistical models, three DH lines sampling processes, two genetic models, and three  
 657 accuracies of assessed single crosses

| Trait              | Samp. proc. | Statistical model | DH lines           | Gen. mod.        | Accuracy of assessed single crosses |                 |                 |
|--------------------|-------------|-------------------|--------------------|------------------|-------------------------------------|-----------------|-----------------|
|                    |             |                   |                    |                  | 0.55                                | 0.77            | 1.00            |
| GY                 | SCs         | Viana et al.      | 1/S <sub>0</sub>   | AD               | 0.7790 ± 0.0124                     | 0.8447 ± 0.0066 | 0.8859 ± 0.0018 |
|                    |             |                   |                    | A                | 0.7688 ± 0.0132                     | 0.8380 ± 0.0067 | 0.8821 ± 0.0019 |
|                    |             |                   | 1-5/S <sub>0</sub> | AD               | 0.7947 ± 0.0125                     | 0.8525 ± 0.0072 | 0.8896 ± 0.0025 |
|                    |             |                   |                    | A                | 0.7895 ± 0.0126                     | 0.8465 ± 0.0077 | 0.8858 ± 0.0027 |
|                    |             |                   | 1-5/S <sub>3</sub> | AD               | 0.8010 ± 0.0145                     | 0.8678 ± 0.0054 | 0.9276 ± 0.0025 |
|                    |             |                   |                    | A                | 0.7954 ± 0.0145                     | 0.8627 ± 0.0056 | 0.9238 ± 0.0026 |
|                    |             |                   | 1-5/S <sub>3</sub> | AD <sup>a</sup>  | 0.7718 ± 0.0161                     | 0.8371 ± 0.0079 | 0.8888 ± 0.0043 |
|                    |             |                   | 1-5/S <sub>3</sub> | AD <sup>b</sup>  | 0.6836 ± 0.0277                     | 0.7885 ± 0.0139 | 0.8817 ± 0.0049 |
|                    |             |                   | 1/S <sub>0</sub>   | AD <sup>c</sup>  | 0.8293 ± 0.0131                     | 0.8944 ± 0.0049 | 0.9479 ± 0.0017 |
|                    |             |                   | 1-5/S <sub>3</sub> | AD <sup>d</sup>  | 0.8267 ± 0.0082                     | 0.8928 ± 0.0043 | 0.9083 ± 0.0023 |
|                    |             | Massman et. al.   | 1/S <sub>0</sub>   | AD               | 0.7874 ± 0.0118                     | 0.8519 ± 0.0053 | 0.8924 ± 0.0026 |
|                    |             |                   | 1-5/S <sub>0</sub> | AD               | 0.7982 ± 0.0140                     | 0.8622 ± 0.0055 | 0.8973 ± 0.0025 |
|                    |             |                   | 1-5/S <sub>3</sub> | AD               | 0.8074 ± 0.0112                     | 0.8753 ± 0.0056 | 0.9314 ± 0.0026 |
|                    |             | GBLUP             | 1/S <sub>0</sub>   | AD               | 0.7841 ± 0.0122                     | 0.8477 ± 0.0064 | 0.8906 ± 0.0019 |
|                    |             |                   | 1-5/S <sub>0</sub> | AD               | 0.7973 ± 0.0124                     | 0.8574 ± 0.0070 | 0.8978 ± 0.0019 |
|                    |             |                   | 1-5/S <sub>3</sub> | AD               | 0.7911 ± 0.0146                     | 0.8639 ± 0.0056 | 0.9319 ± 0.0023 |
|                    |             | BLUP              | 1/S <sub>0</sub>   | AD               | 0.7855 ± 0.0129                     | 0.8541 ± 0.0059 | 0.8899 ± 0.0019 |
|                    |             |                   | 1-5/S <sub>0</sub> | AD               | 0.7803 ± 0.0143                     | 0.8435 ± 0.0074 | 0.8830 ± 0.0024 |
|                    |             |                   | 1-5/S <sub>3</sub> | AD               | 0.7227 ± 0.0203                     | 0.7915 ± 0.0077 | 0.8373 ± 0.0048 |
|                    |             | DHS               | Viana et al.       | 1/S <sub>0</sub> | AD                                  | 0.5012 ± 0.0416 | 0.5117 ± 0.0467 |
| 1-5/S <sub>0</sub> | AD          |                   |                    | 0.4827 ± 0.0423  | 0.5000 ± 0.0420                     | 0.5036 ± 0.0465 |                 |
| 1-5/S <sub>3</sub> | AD          |                   |                    | 0.5799 ± 0.0437  | 0.6106 ± 0.0413                     | 0.6357 ± 0.0429 |                 |
| EV                 | SCs         | Viana et al.      | 1/S <sub>0</sub>   | AD               | 0.7779 ± 0.0157                     | 0.8458 ± 0.0069 | 0.8820 ± 0.0024 |
|                    |             |                   | 1-5/S <sub>0</sub> | AD               | 0.8019 ± 0.0155                     | 0.8656 ± 0.0050 | 0.9055 ± 0.0020 |
|                    |             |                   | 1-5/S <sub>3</sub> | AD               | 0.7589 ± 0.0143                     | 0.8424 ± 0.0058 | 0.9165 ± 0.0027 |

<sup>a</sup>density of 1 cM; <sup>b</sup>training set of 490 single crosses (10%); <sup>c</sup>after 10 generations of random crosses; <sup>d</sup>single crosses from DH lines of the same population.

658 **Table 2** Average coincidence of the best 300 predicted single crosses and its standard deviation,  
 659 assuming single crosses from selected DH lines, 30 and 10% of assessed single crosses, two traits  
 660 (grain yield - GY, g/plant, and expansion volume - EV, mL/g), two sampling processes of single  
 661 crosses, four statistical models, three DH lines sampling processes, two genetic models, and three  
 662 parametric coincidence of assessed single crosses

| Trait              | Samp. proc. | Statistical model | DH lines           | Gen. mod.        | Coincidence of assessed single crosses |                 |                 |
|--------------------|-------------|-------------------|--------------------|------------------|----------------------------------------|-----------------|-----------------|
|                    |             |                   |                    |                  | 0.26                                   | 0.48            | 1.00            |
| GY                 | SCs         | Viana et al.      | 1/S <sub>0</sub>   | AD               | 0.4523 ± 0.0334                        | 0.5525 ± 0.0190 | 0.6037 ± 0.0170 |
|                    |             |                   |                    | A                | 0.4396 ± 0.0346                        | 0.5449 ± 0.0176 | 0.5976 ± 0.0172 |
|                    |             |                   | 1-5/S <sub>0</sub> | AD               | 0.5686 ± 0.0273                        | 0.6369 ± 0.0221 | 0.6842 ± 0.0140 |
|                    |             |                   |                    | A                | 0.5640 ± 0.0283                        | 0.6299 ± 0.0221 | 0.6816 ± 0.0152 |
|                    |             |                   | 1-5/S <sub>3</sub> | AD               | 0.5129 ± 0.0235                        | 0.6044 ± 0.0200 | 0.7363 ± 0.0183 |
|                    |             |                   |                    | A                | 0.5063 ± 0.0225                        | 0.5993 ± 0.0193 | 0.7305 ± 0.0190 |
|                    |             |                   | 1-5/S <sub>3</sub> | AD <sup>a</sup>  | 0.4881 ± 0.0278                        | 0.5691 ± 0.0229 | 0.6620 ± 0.0215 |
|                    |             |                   | 1-5/S <sub>3</sub> | AD <sup>b</sup>  | 0.3805 ± 0.0511                        | 0.4797 ± 0.0354 | 0.6087 ± 0.0233 |
|                    |             |                   | 1/S <sub>0</sub>   | AD <sup>c</sup>  | 0.5528 ± 0.0298                        | 0.6489 ± 0.0203 | 0.7571 ± 0.0162 |
|                    |             |                   | 1-5/S <sub>3</sub> | AD <sup>d</sup>  | 0.6116 ± 0.0214                        | 0.7156 ± 0.0150 | 0.7581 ± 0.0166 |
|                    |             | Massman et. al.   | 1/S <sub>0</sub>   | AD               | 0.4670 ± 0.0346                        | 0.5663 ± 0.0174 | 0.6157 ± 0.0157 |
|                    |             |                   | 1-5/S <sub>0</sub> | AD               | 0.5651 ± 0.0310                        | 0.6431 ± 0.0164 | 0.6955 ± 0.0144 |
|                    |             |                   | 1-5/S <sub>3</sub> | AD               | 0.5279 ± 0.0291                        | 0.6139 ± 0.0204 | 0.7423 ± 0.0172 |
|                    |             | GBLUP             | 1/S <sub>0</sub>   | AD               | 0.4622 ± 0.0308                        | 0.5660 ± 0.0190 | 0.6092 ± 0.0163 |
|                    |             |                   | 1-5/S <sub>0</sub> | AD               | 0.5650 ± 0.0280                        | 0.6384 ± 0.0204 | 0.6849 ± 0.0137 |
|                    |             |                   | 1-5/S <sub>3</sub> | AD               | 0.5010 ± 0.0245                        | 0.5937 ± 0.0216 | 0.7294 ± 0.0168 |
|                    |             | BLUP              | 1/S <sub>0</sub>   | AD               | 0.4641 ± 0.0331                        | 0.5709 ± 0.0176 | 0.6081 ± 0.0127 |
|                    |             |                   | 1-5/S <sub>0</sub> | AD               | 0.5531 ± 0.0323                        | 0.6272 ± 0.0194 | 0.6699 ± 0.0130 |
|                    |             |                   | 1-5/S <sub>3</sub> | AD               | 0.4172 ± 0.0258                        | 0.4731 ± 0.0211 | 0.5377 ± 0.0196 |
|                    |             | DHS               | Viana et al.       | 1/S <sub>0</sub> | AD                                     | 0.2753 ± 0.0374 | 0.3056 ± 0.0445 |
| 1-5/S <sub>0</sub> | AD          |                   |                    | 0.3268 ± 0.0642  | 0.3400 ± 0.0691                        | 0.3461 ± 0.0728 |                 |
| 1-5/S <sub>3</sub> | AD          |                   |                    | 0.3699 ± 0.0583  | 0.3931 ± 0.0579                        | 0.4300 ± 0.0633 |                 |
| EV                 | SCs         | Viana et al.      | 1/S <sub>0</sub>   | AD               | 0.5156 ± 0.0331                        | 0.6081 ± 0.0159 | 0.6599 ± 0.0146 |
|                    |             |                   | 1-5/S <sub>0</sub> | AD               | 0.5506 ± 0.0285                        | 0.6337 ± 0.0203 | 0.6944 ± 0.0141 |
|                    |             |                   | 1-5/S <sub>3</sub> | AD               | 0.4746 ± 0.0294                        | 0.5843 ± 0.0174 | 0.7141 ± 0.0171 |

<sup>a</sup>density of 1 cM; <sup>b</sup>training set of 490 single crosses (10%); <sup>c</sup>after 10 generations of random crosses; <sup>d</sup>single crosses from DH lines of the same population.

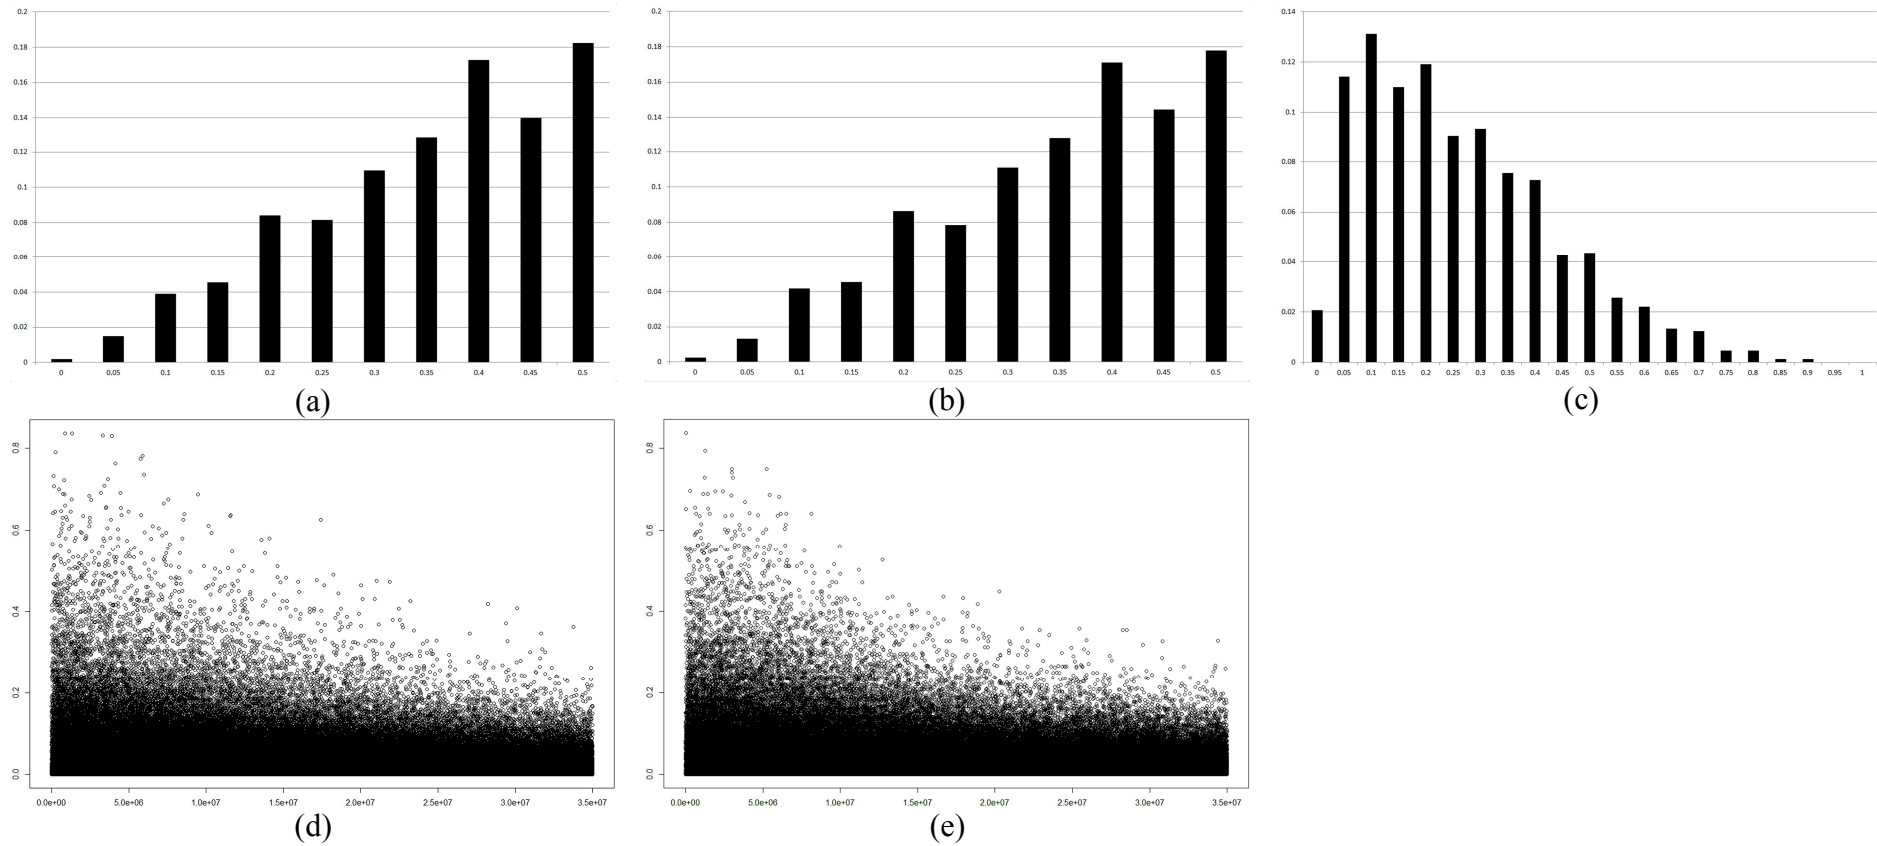

663 **Figure 1** Frequency distribution of the MAF in the groups of selected DH lines (a and b) and the absolute value of the difference between a SNP allele  
 664 frequency (c), and LD ( $r^2$ ) in relation to distance (cM) in the two groups of selected DH lines (d and e), regarding SNPs in chromosome 1 separated by  
 665 zero to 35 cM, assuming one DH line per  $S_0$  plant.

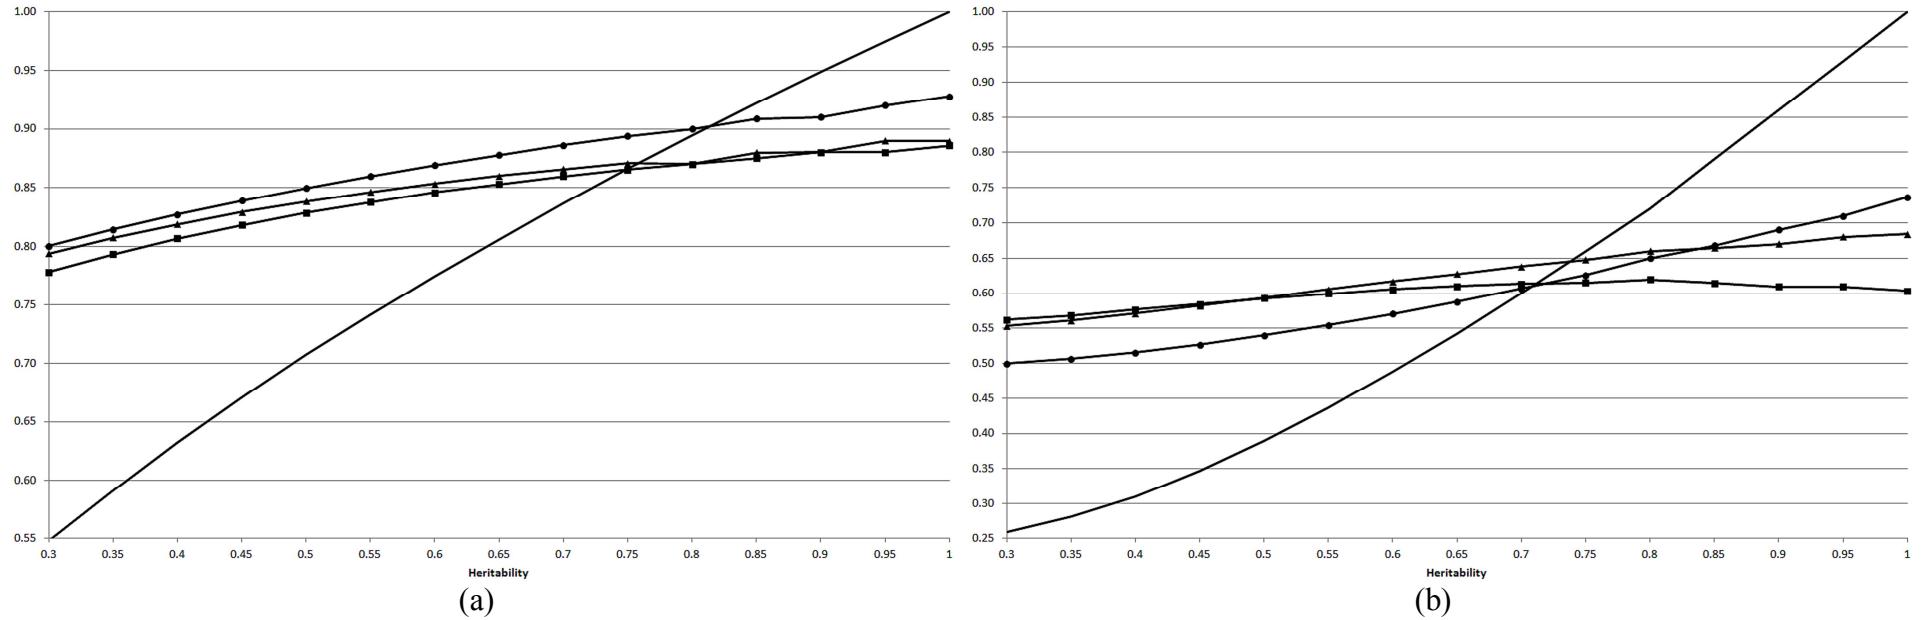

666 **Figure 2** Predicted accuracies (a) and coincidence indexes (b) for untested single crosses (square:  $1/S_0$ ; triangle:  $1-5/S_0$ ; circle:  $1-5/S_3$ ), and parametric  
 667 accuracies and coincidence indexes for tested single crosses (continuous line), assuming our model, average SNP density of 0.1 cM, training set size of  
 668 30%, positive dominance (grain yield), additive-dominance model, and sampling of single crosses.
